# Supplementary material for: Nrf2 signaling links ER oxidative protein folding and calcium homeostasis in health and disease
Source: Life Sci Alliance. 2019 Oct 28;2(5):e201900563. doi: 10.26508/lsa.201900563 (PMC6819749; doi:10.26508/lsa.201900563)
Supplement: Supplementary file 1 [file LSA-2019-00563_TableS1.xlsx]

## Sheet: Sheet1
Antibody name	Catalog #	Clone #	Specie	Provider	Asssay	RRID	Validation Status
							(Antibodypedia & Antibody registry)
Bip/Grp78	610978	40	Mouse Monoclonal	BD Biosciences	WB	AB_398291	Not found
β-actin	A5316	AC-74	Mouse Monoclonal	Sigma	WB	AB_476743	Recommended by provider
EAAT1	Ab416	NA	Rabbit Polyclonal	AbCam	WB	AB_304334	validation status unknown, seller recommendations
EAAT2	NA	NA	Rabbit Polyclonal	Dr. D. Trotti (Thomas Jefferson University)	WB	NA	Unknown
MCU	HPA016480	NA	Rabbit Polyclonal	Sigma	WB	AB_2071893	Supportive data
OXPHOS cocktail	Ab110413	NA	Cocktail of 5 mouse monoclonal	AbCam	WB	AB_2629281	Data presented on provider website
Tom20	SC-11021	C-20	Goat Polyclonal	Santa Cruz Biotechnology	WB	AB_2207536	validation status unknown, seller recommendations
SOD 1	ADI-SOD100	NA	Rabbit polyclonal	Enzo Life Sciences	WB	AB_10616253	Recommended by provider
V5	R960-25	NA	Mouse Monoclonal	Thermo Scientific	WB	AB_2556564	Recommended by provider
Nrf2	SC-365949	A-10	Mouse Monoclonal	Santa Cruz Biotechnology	WB	AB_10917561	Data presented on provider website
Histone H3	9715	NA	Rabbit Polyclonal	Cell Signaling Technology	WB	AB_331563	Data presented on provider website
IP3R2	AB9074	NA	Rabbit Polyclonal	EMD Millipore	WB	AB_571028	Recommended by provider
mGluR1/5	75-116	N75/33	Mouse Monoclonal	UC Davis NeuroMabs	WB	AB_2232873	Supportive data
mGluR2/3	2030-mGLUR2/3	NA	Rabbit Polyclonal	Phosphosolutions	WB	AB_2492151	Data presented on provider website
PDI	ADI-SPA890	NA	Rabbit Polyclonal	Enzo Life Sciences	WB	AB_10616242	Recommended by provider
GPx8	AG-25B-0028	NA	Rabbit Monoclonal	Adipogen	WB	AB_2490460	Recommended by provider
Misfolded SOD1	MM0070-2	C4F6	Mouse Monoclonal	MediMABS	WB	AB_10015296	Recommended by provider
GFAP	Z0334	NA	Rabbit Polyclonal	Dako & Agilent Technologies, Inc	IHC/WB	AB_10013382	Supportive data
Aquaporin 4	SC-32739	NA	Mouse Monoclonal	Santa Cruz Biotechnology	IHC	AB_626695	validation status unknown, seller recommendations
GDE2 Loop	NA	NA	Rabbit Polyclonal	Dr. S.Sockanathan (Johns Hopkins University)	IHC	NA	Unknown
myc	Ab32	9E10	Mouse Monoclonal	AbCam	IHC	AB_303599	Data presented on provider website
Calreticulin	PA3-900	NA	Rabbit Polyclonal	Thermo Fischer Scientific	IHC	AB_325990	validation status unknown, seller recommendations
Aldh1L1	75-164	NA	Mouse Monoclonal	UC Davis NeuroMabs	IHC	AB_10671695	Supportive data
Flag	F3165	NA	Mouse Monoclonal	Sigma	IHC	AB_259529	Recommended by provider
